# Supplementary material for: Smartphone Apps for Schizophrenia: A Systematic Review
Source: JMIR Mhealth Uhealth. 2015 Nov 6;3(4):e102. doi: 10.2196/mhealth.4930 (PMC4704940; doi:10.2196/mhealth.4930)
Supplement: Multimedia Appendix 1 [file mhealth_v3i4e102_app1.pdf]

| Studies              | Intervention summary                                                                                                                                                                                              | Duration (days) | Total (n)                  | Attrition                   | Adherence                                                                                          | User experience                                                                                                                                                              | Reported benefits                                                                                                                                                                |
|----------------------|-------------------------------------------------------------------------------------------------------------------------------------------------------------------------------------------------------------------|-----------------|----------------------------|-----------------------------|----------------------------------------------------------------------------------------------------|------------------------------------------------------------------------------------------------------------------------------------------------------------------------------|----------------------------------------------------------------------------------------------------------------------------------------------------------------------------------|
| Ainsworth et al [25] | <i>Android app “ClinTouch”</i> : a randomized control trial comparing app-based vs short messaging service-based mobile phone ambulatory monitoring systems for schizophrenia.                                    | 6               | 24 (24 with schizophrenia) | 0/24                        | 69% of all possible entries were completed<br><br>2.8 uses per day (mean average)                  | The app was rated as “pleasing” overall (scoring 3.7 on a 7-point scale). The app was not rated as “stressful” or “challenging” (scoring only 1.8 and 2.2 on 7-point scales) | Participants felt the app could help them or other service users (5.3 on a 7-point scale)                                                                                        |
| Ben Zeev et al [27]  | <i>Android app “FOCUS”</i> : Single-arm feasibility trial of real-time/real-place illness management support for schizophrenia.                                                                                   | 28              | 33 (33 with schizophrenia) | 1/33 due to losing phone    | Participants used FOCUS on 86.5% of days in the study<br><br>5.2 uses per day (mean average)       | 93.7% of participants satisfied with overall ease of use. Less than 20% found the app to be “awkward,” “complicated,” or “inconsistent.”                                     | 87.5% of participants felt that the app helped to manage symptoms. Paired samples <i>t</i> tests showed significant reductions in positive and negative symptoms and depression. |
| Macias et al [30]    | <i>iPhone and Android app ‘WellWave’</i> : Assessing feasibility of an app which promoted walking as a physical exercise, and offered a variety of supportive nonphysical activities, including confidential text | 28              | 11 (4 with schizophrenia)  | 1/11 withdrew of own accord | Used on 94% of days<br><br>73 % response rate to prompts (3.54 per day)<br><br>70% of participants | 100% of participants were satisfied with the app overall. Only criticisms were made, pertaining to color/sound                                                               | Participants experienced both improved well-being (eg, put my head in a good place) and practical                                                                                |

|                                                  |                                                                                                                                                                                                                                |        |                            |                                      |                                                                           |                                                                                                                                                                                    |                                                                                                                            |
|--------------------------------------------------|--------------------------------------------------------------------------------------------------------------------------------------------------------------------------------------------------------------------------------|--------|----------------------------|--------------------------------------|---------------------------------------------------------------------------|------------------------------------------------------------------------------------------------------------------------------------------------------------------------------------|----------------------------------------------------------------------------------------------------------------------------|
|                                                  | messaging with peer staff and a digital library of videos on recovery.                                                                                                                                                         |        |                            |                                      | achieved $\geq 2$ walks per week                                          | preferences, and the study coming to an end.                                                                                                                                       | benefits (eg, Motivated me to get up and walk around the block).                                                           |
| Naslund et al [28]<br><br>Aschbrenner et al [29] | <i>iPhone app "PeerFIT" with wearable activity monitor</i> : Assessing feasibility and acceptability of popular m-health technologies for activity tracking among overweight and obese individuals with serious mental illness | 80-133 | 10 (3 with schizophrenia)  | 1/10 withdrew due to medical reasons | Participants used activity monitors on 89% of days in the study           | 100% were "very satisfied" or "somewhat satisfied" with PeerFIT overall; 60% would recommend to a friend. Participants felt the devices were expensive for low-income individuals. | 100% found the program helped them to reach their goals. Mean weight loss of 2.7 kg across all participants ( $P > .05$ ). |
| Palmieri-Claus et al [23,24]                     | <i>Android app "ClinTouch"</i> : Single-arm feasibility trial of an app-based monitoring system for psychosis.                                                                                                                 | 7      | 44 (36 with schizophrenia) | 8/44 due to noncompliance            | 72% of all possible entries were completed<br><br>4.4 uses per day (mean) | Not reported                                                                                                                                                                       | Smartphone app provided clinically valid real-time measures of psychotic symptoms and affective state                      |
